# Supplementary material
Source: PubMed Central journal article supplement (PMC4068218)

**Exploration of Type II Binding Mode: a Privileged Approach for Kinase Inhibitor  
Focused Drug Discovery?**

**Supplemental information**

Zheng Zhao<sup>1</sup>, Hong Wu<sup>1,2</sup>, Li Wang<sup>1</sup>, Yi Liu<sup>3</sup>, Stefan Knapp<sup>4,5</sup>, Qingsong Liu<sup>1,2\*</sup>,  
Nathanael S. Gray<sup>6\*</sup>

<sup>1</sup>High Magnetic Field Laboratory, Chinese Academy of Sciences, P.O. Box 1110, Hefei,  
Anhui 230031, P.R. China;

<sup>2</sup>University of Science and Technology of China, P. R. China, Anhui, Hefei, 230036

<sup>3</sup>Wellspring Biosciences LLC, 3210 Merryfield Row, San Diego, CA 92121;

<sup>4</sup>Structural Genomics Consortium, University of Oxford, Old Road Campus Research  
Building, Roosevelt Drive, Oxford, OX3 7DQ, UK;

<sup>5</sup>Target Discovery Institute, University of Oxford, NDM Research Building, Roosevelt  
Drive, Oxford, OX37LD, UK

<sup>6</sup>Department of Biological Chemistry and Molecular Pharmacology, Harvard Medical  
School, 250 Longwood Avenue, Boston, MA 02115, USA

\*Correspondence: Qsliu97@hmfl.ac.cn (QL), nathanael\_gray@dfci.harvard.edu (NSG)

Supplemental Fig. 1 type II kinase inhibitors extracted from DFG-out conformations of co-crystal structures.

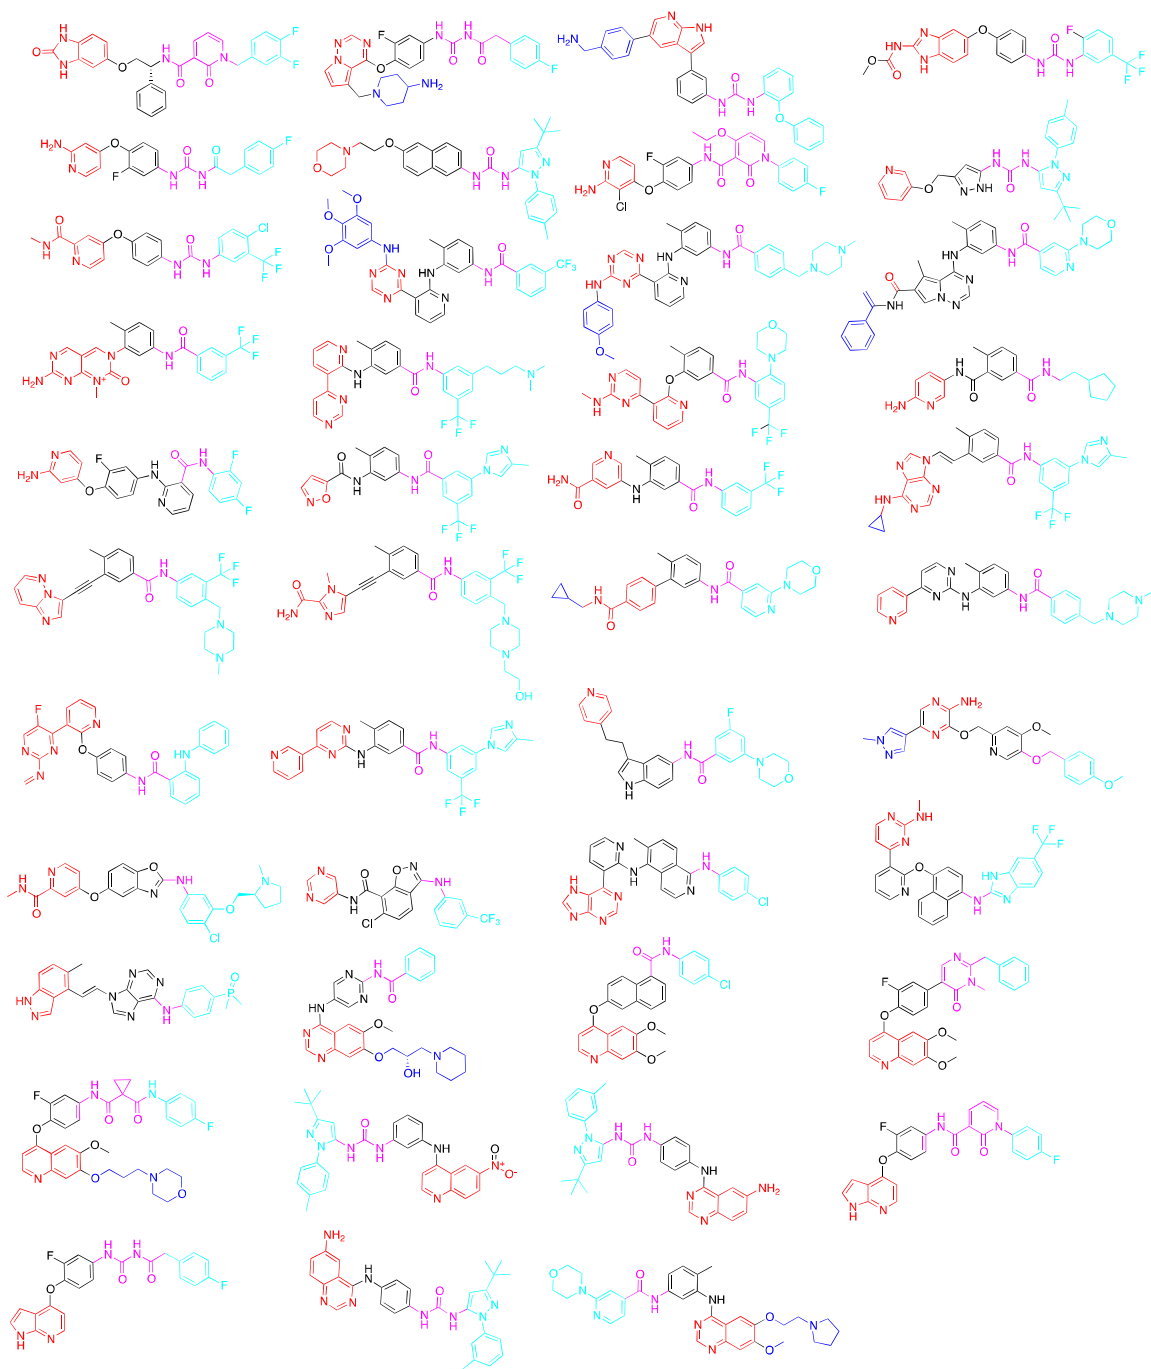

Supplemental Fig. 2 Treemap representation of 12 selected type II kinase inhibitors

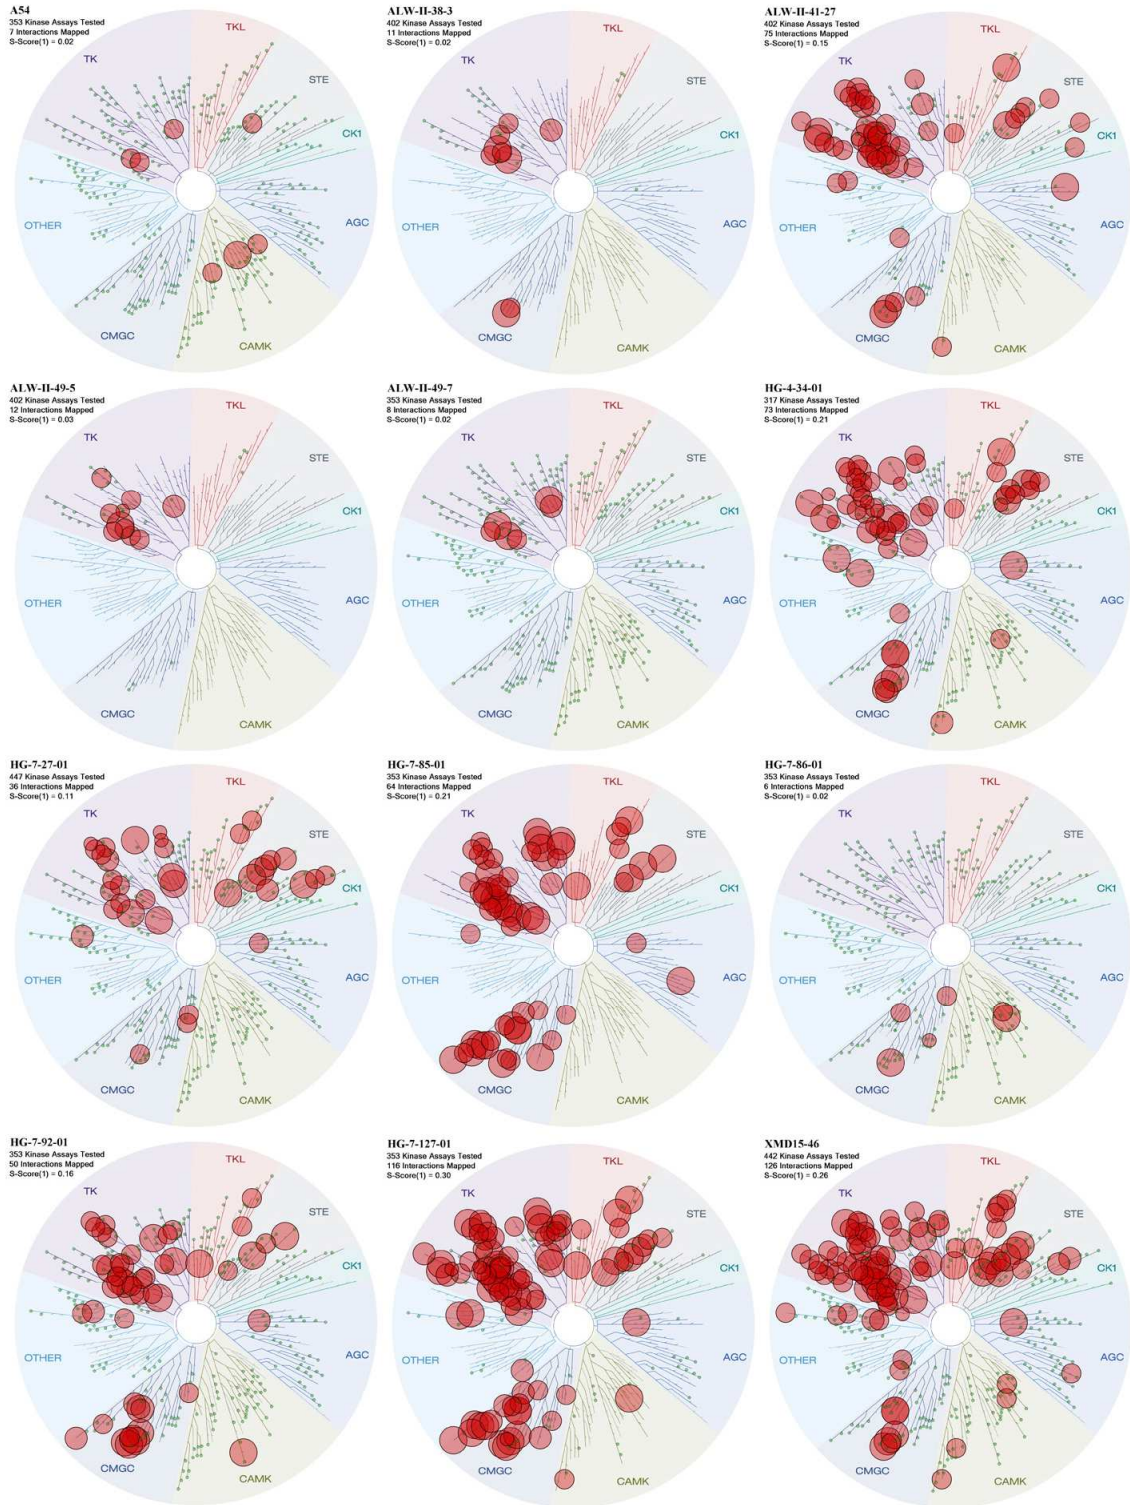

Supplement: cb500129t_si_005.pdf [file cb500129t_si_005.pdf]
